# Supplementary material
Source: PubMed Central journal article supplement (PMC4366648)

## **SUPPLEMENTAL EXPERIMENTAL PROCEDURES**

### **BAC-mediated recombineering:**

The *GFP-SuUR* transgenic line was generated through BAC-mediated recombineering (Sharan et al., 2009). First, a *galk* cassette was PCR amplified and used to replace the start codon of *SuUR* in an *attB-P[acman]* clone with a 21-kb genomic region containing the *SuUR* locus (CH322-163L18; pacmanfly.org; bacpac.chori.org). Next the *galk* cassette was replaced with *GFP* lacking a stop codon to create a seamless in-frame fusion between *GFP* and the 5' end of *SuUR* by selecting for loss of *galk*. After fingerprinting and PCR verification, the resulting BAC was injected into a strain harboring the *attP40* landing site (Genetic Services).

### **Complementation test by copy number analysis:**

The function of the GFP-SUUR fusion protein was evaluated by complementation tests of the *SuUR* mutant, measuring copy number of underreplicated regions. Salivary glands were dissected from 10 wandering 3<sup>rd</sup> instar larvae and genomic DNA was extracted. Quantitative real-time PCR was used to assay copy number at two underreplicated loci as described (Sher et al., 2012).

### **SUUR antibodies**

For immunofluorescence studies of follicle cells anti-SUUR serum was produced in guinea pigs (Covance, Inc). GST was fused to residues 371-583 of SUUR and expressed in *E. coli*. The insoluble fraction was separated by SDS-PAGE and the fusion protein was excised. The resulting protein was used to inject guinea pigs. Full

length 3XFLAG-SUUR-6XHis was produced from Sf9 insect cells and used for affinity purification as described (Moore et al., 1998).

For immunoprecipitations a GST fusion to full-length SUUR was produced in *E. coli* and used to immunize both rabbit and guinea pig. The same protein was used for purification of anti-SUUR antibodies from sera obtained as described (Chalkley and Verrijzer, 2004).

### **Cytological analysis and microscopy:**

Ovaries were fixed in 4% formaldehyde for 15 minutes and extracted in PBS containing 0.1% Triton X-100. Blocking was done in PBS containing 0.1% Triton X-100, 1% BSA and 2% normal goat serum. Affinity-purified guinea pig anti-SUUR antibody was used at a dilution of 1:200. GFP-Booster (Chromotek) was used at a dilution of 1:200. Alexa Fluor-488-conjugated secondary (Life Technologies) was used at a dilution of 1:500. After incubation in secondary antibody, the EdU detection reaction was performed according to the manufactures recommendations using Click-iT EdU Alexa Fluor-555 (Invitrogen). For EdU labeling, ovaries were dissected, pulsed, fixed, permeabilized and detected as above.

*Amplification foci quantification:* To quantify the fraction of follicle cells incorporating EdU, all egg chambers from the indicated genotypes were prepared and imaged as a Z series in parallel with equal exposure times. After image deconvolution, maximum projection images were used to score for the presence or absence of amplification foci.

*Double bar distance measurements:* The distance between double bars has been shown to correlate with replication fork progression (Park et al., 2007). Follicle cells from stage 12 egg chambers were imaged as a Z series and deconvolved. The center-to-center distance between double bars were measured using the NIS-Elements AR 3.2 software from a single plane image. Each data point represents the average of 6-12 measurements per double-bar structure.

### **CDC45-RNAi Analysis:**

For polytene chromosome squashes, flies were raised on standard *Drosophila* cornmeal-yeast-agar medium at 23°C. *Oregon R* and *SuUR* were used as controls for the Western blot analysis. Salivary glands from wandering third-instar larvae were dissected in PBS. Glands were then transferred into a formaldehyde-based fixative (3% lactic acid, 2 mM KCl, 45% acetic acid, 3.7% formaldehyde) for 2 min. The primary antibody dilutions used were as follows: rabbit polyclonal anti-SUUR (E-45) (Makunin et al., 2002), 1:50; mouse monoclonal anti-PCNA (ab29, Abcam) 1:500. The squashes were incubated with secondary goat anti-rabbit and anti-mouse antibodies labeled with Alexa Fluor-488 and Alexa Fluor-568 (Life Technologies). DNA was visualized by DAPI staining.

For Western blotting, we used the following antibody dilutions: rabbit anti-CDC45 (kindly provided by N. Vorobyeva (Vorobyeva et al., 2013), 1:300; mouse anti-PCNA (ab29, Abcam), 1:1000; rabbit anti-SUUR (E-45), 1:250; mouse anti-tubulin, 1:500 (Bx69, kindly provided by H. Saumweber (Tavares et al., 1996); goat anti-rabbit and anti-mouse HRP-IgG conjugates (G21234, G21040, Life Technologies), 1:3000.

### **ChIP-seq:**

*Antibodies:* Full length 6His-CDC45-Strep-tagII was produced from Sf9 insect cells and used for affinity purification as described (Moore et al., 1998). Anti-Cdc45 serum was kindly provided by M. Botchan, UC Berkeley (Moyer et al., 2006). The affinity purified guinea pig anti-SUUR antibody used for immunofluorescence also was used in ChIP reactions.

*Library preparation, sequencing information and bioinformatics analysis:* Libraries were prepared using NEBNext ChIP-Seq for Illumina according the manufactures protocol (New England Biolabs). Libraries were sequenced on Illumina's HiSeq platform and reads were mapped to the Apr. 2006 (BDGP Release 5) assembly of the *Drosophila* genome using BWA (Li and Durbin, 2009).

For salivary gland samples, ChIP peaks were called using MACS (v1.4) with a p-value of  $1e-5$ , using input samples as controls (Zhang et al., 2008). To further increase stringency, peaks with a false discovery rate of  $<5\%$  were used in the analysis.

For egg chamber samples, MACS2 was used to call peaks with a p-value of  $1e-3$ .

Peaks called in amplified regions tended to be broad, likely due to the changes in copy number. Therefore, we quantified SUUR and CDC45 enrichment in 1kb intervals across *DAFC-66D*. To this end, read counts were summed in non-overlapping 1kb windows across *DAFC-66D* and for both ChIP and input samples.

Reads in each sample were then normalized to reads per million (RPM). The ratio of normalized ChIP reads relative to input reads were calculated for each window.

**IP-mass spectrometry:**

The immunoprecipitates were subjected to mass spectrometry as detailed in (Moshkin et al., 2009; Wilm et al., 1996). The criteria for defining a protein as associated with SUUR was that it was present in IP samples using both antibodies and at least five-fold enriched over background mock-IP samples.

**CGH copy number analysis:**

Tiling arrays containing genomic regions specifically amplified in follicle cells in combination with control regions at 125bp resolution as recommended by Agilent (AMAID# 027763). The resulting data was LOESS normalized and smoothed using the software package Ringo in R.

To quantify the effect loss of SUUR function or SUUR overexpression has on replication profiles at each site of amplification we first determined the highest point of amplification by quantifying the point in the gradient with the maximum copy number. Next, we determined the location on each arm of the amplicon corresponding to half the maximum copy number, allowing quantification of the distance between the half maximum point of each arm of the replication gradient. This provides a quantitative measure of fork progression at all sites of amplification.

## SUPPLEMENTAL REFERENCES

Chalkley, G.E., and Verrijzer, C.P. (2004). Immuno-depletion and purification strategies to study chromatin-remodeling factors in vitro. *Meth. Enzymol.* *377*, 421–442.

Li, H., and Durbin, R. (2009). Fast and accurate short read alignment with Burrows-Wheeler transform. *Bioinformatics* *25*, 1754–1760.

Moore, D.P., Page, A.W., Tang, T.T., Kerrebrock, A.W., and Orr-Weaver, T.L. (1998). The cohesion protein MEI-S332 localizes to condensed meiotic and mitotic centromeres until sister chromatids separate. *J. Cell Biol.* *140*, 1003–1012.

Moshkin, Y.M., Kan, T.W., Goodfellow, H., Bezstarosti, K., Maeda, R.K., Pilyugin, M., Karch, F., Bray, S.J., Demmers, J.A.A., and Verrijzer, C.P. (2009). Histone chaperones ASF1 and NAP1 differentially modulate removal of active histone marks by LID-RPD3 complexes during NOTCH silencing. *Mol. Cell* *35*, 782–793.

Park, E.A., MacAlpine, D.M., and Orr-Weaver, T.L. (2007). *Drosophila* follicle cell amplicons as models for metazoan DNA replication: a *cyclinE* mutant exhibits increased replication fork elongation. *Proc. Natl. Acad. Sci. USA* *104*, 16739–16746.

Sharan, S.K., Thomason, L.C., Kuznetsov, S.G., and Court, D.L. (2009). Recombineering: a homologous recombination-based method of genetic engineering. *Nat Protoc* *4*, 206–223.

Tavares, A.A., Glover, D.M., and Sunkel, C.E. (1996). The conserved mitotic kinase polo is regulated by phosphorylation and has preferred microtubule-associated substrates in *Drosophila* embryo extracts. *The EMBO Journal.* *15*, 4873–4883.

Vorobyeva, N.E., Mazina, M.U., Golovnin, A.K., Kopytova, D.V., Gurskiy, D.Y., Nabirochkina, E.N., Georgieva, S.G., Georgiev, P.G., and Krasnov, A.N. (2013). Insulator protein Su(Hw) recruits SAGA and Brahma complexes and constitutes part of Origin Recognition Complex-binding sites in the *Drosophila* genome. *Nucleic Acids Res.* *11*, 5717-30.

Wilm, M., Shevchenko, A., Houthaeve, T., Breit, S., Schweigerer, L., Fotsis, T., and Mann, M. (1996). Femtomole sequencing of proteins from polyacrylamide gels by nano-electrospray mass spectrometry. *Nature* *379*, 466–469.

Zhang, Y., Liu, T., Meyer, C.A., Eeckhoute, J., Johnson, D.S., Bernstein, B.E., Nusbaum, C., Myers, R.M., Brown, M., Li, W., et al. (2008). Model-based analysis of ChIP-Seq (MACS). *Genome Biol.* *9*, R137.

## SUPPLEMENTAL FIGURE LEGENDS

Figure S1. SUUR is localized to sites of gene amplification, Related to Figure 1.

(A) Specificity of affinity purified anti-SUUR antibody. Representative image of wild-type and *SuUR* mutant stage 11 follicle cells. Replication forks are marked by EdU incorporation (red), SUUR by immunostaining (green) and DNA by DAPI staining (blue). Individual channels are shown as labeled. Samples were imaged with equal exposure times and brightness was linearly adjusted for presentation. Scale bar = 2 $\mu$ m.

(B) Localization of a functional GFP-SUUR fusion protein in a stage 13 follicle cell. The arrowhead marks SUUR constitutively localized to heterochromatin. Replication forks are marked by EdU incorporation (red), GFP immunostaining (green) and DNA by DAPI staining (blue). A single representative follicle cell nucleus is shown. Individual channels are shown as labeled. Scale bar = 2 $\mu$ m

(C) *GFP-SuUR* complementation assay. Quantitative PCR measurements of copy number at *36C* and *36D* from wandering third-instar salivary glands. Copy number changes are relative to fully replicated diploid embryonic DNA. The graph represents the average of two biological replicates. Error bars represent the SEM. GFP-SUUR is functional, because it leads to reduced copy number at the two normally underreplicated domains.

Figure S2. SUUR affects replication fork progression, Related to Figure 3

Array based comparative genomic hybridization (aCGH) of all follicle cell amplicons, with copy number shown in log<sub>2</sub>. DNA extracted from stage 13 egg chambers of the

indicated genotypes is compared to diploid 0-2h embryonic DNA. Quantification of replication profiles is listed in Table S1.

Figure S3. Loss of SUUR function does not affect fork rate but results in prolonged EdU incorporation during gene amplification, Related to Figure 3

(A) Quantification of the double-bar distance from stage 12 follicle cells. Each data point represents the average of 6-12 measurements from the center-to-center distance of an individual double bar. Wild-type mean = 0.64  $\mu\text{m}$  ( $\pm 0.1\text{SD}$ ); *SuUR* mean 0.69 ( $\pm 0.06\text{SD}$ ). A Mann-Whitney test determined the mean values are not statistically significant ( $P = 0.4283$ ).

(B) The fraction of amplifying (EdU positive) follicle cells during each stage of gene amplification quantified from two biological replicates.  $n > 200$  (mean  $\pm$  SEM).

Figure S4. DNA damage profiles for the major chromosome arms, Related to Figure 4  
aCGH and  $\gamma\text{H2Av}$  ChIP-seq profiles from wild-type and *SuUR* mutant wandering third-instar larval salivary glands. Each chromosome arm is shown as indicated, except the fourth chromosome. IgG serves as a control for nonspecific binding. ChIP-seq peaks were called by MACS relative to input DNA. aCGH data are from (Sher et al., 2012).



| <b>Table S1. Quantitative analysis of CGH profiles at all sites of gene amplification, Related to Figure 3.</b>                                                               |                          |               |                |                           |                                 |  |
|-------------------------------------------------------------------------------------------------------------------------------------------------------------------------------|--------------------------|---------------|----------------|---------------------------|---------------------------------|--|
| <b>OrR</b>                                                                                                                                                                    | log2 copy number at peak | Left arm (bp) | Right arm (bp) | half max to half max (bp) | difference relative to OrR (bp) |  |
| 22B                                                                                                                                                                           | 1.2852                   | 17840         | 27810          | 45650                     | 0                               |  |
| 30B                                                                                                                                                                           | 1.2897                   | 31090         | 47620          | 78710                     | 0                               |  |
| 34B                                                                                                                                                                           | 1.8756                   | 35680         | 25660          | 61340                     | 0                               |  |
| 62D                                                                                                                                                                           | 1.2393                   | 44210         | 28980          | 73190                     | 0                               |  |
| 66D                                                                                                                                                                           | 4.2808                   | 36300         | 39340          | 75640                     | 0                               |  |
| 7F                                                                                                                                                                            | 3.0303                   | 41490         | 26260          | 67750                     | 0                               |  |
| <b>SuUR</b>                                                                                                                                                                   |                          |               |                |                           |                                 |  |
| 22B*                                                                                                                                                                          | 0.0161                   | NA            | NA             | NA                        | NA                              |  |
| 30B                                                                                                                                                                           | 1.3443                   | 34700         | 55820          | 90520                     | 11810                           |  |
| 34B                                                                                                                                                                           | 2.0035                   | 51190         | 48710          | 99900                     | 38560                           |  |
| 62D                                                                                                                                                                           | 1.3325                   | 52580         | 47180          | 99760                     | 26570                           |  |
| 66D                                                                                                                                                                           | 4.4111                   | 53660         | 46100          | 99760                     | 24120                           |  |
| 7F                                                                                                                                                                            | 3.0241                   | 46360         | 53470          | 99830                     | 32080                           |  |
| <b>4X-SuUR</b>                                                                                                                                                                |                          |               |                |                           |                                 |  |
| 22B*                                                                                                                                                                          | 0.1379                   | NA            | NA             | NA                        | NA                              |  |
| 30B                                                                                                                                                                           | 1.4703                   | 20690         | 26640          | 47330                     | -31380                          |  |
| 34B                                                                                                                                                                           | 2.246                    | 20140         | 15990          | 36130                     | -25210                          |  |
| 62D                                                                                                                                                                           | 1.3557                   | 24250         | 15800          | 40050                     | -33140                          |  |
| 66D                                                                                                                                                                           | 5.0383                   | 17630         | 21410          | 39040                     | -36600                          |  |
| 7F                                                                                                                                                                            | 3.5175                   | 20980         | 19420          | 40400                     | -27350                          |  |
| <b>6X-SuUR</b>                                                                                                                                                                |                          |               |                |                           |                                 |  |
| 22B*                                                                                                                                                                          | 0.0361                   | NA            | NA             | NA                        | NA                              |  |
| 30B                                                                                                                                                                           | 1.4724                   | 18760         | 22340          | 41100                     | -37610                          |  |
| 34B                                                                                                                                                                           | 2.2483                   | 23180         | 16310          | 39490                     | -21850                          |  |
| 62D                                                                                                                                                                           | 1.2927                   | 28810         | 16140          | 44950                     | -28240                          |  |
| 66D                                                                                                                                                                           | 4.9185                   | 20880         | 23660          | 44540                     | -31100                          |  |
| 7F                                                                                                                                                                            | 3.3831                   | 22400         | 21180          | 43580                     | -24170                          |  |
| *DAFC-22B does not amplify in the SuUR mutant and overexpression strains. The amplification of this region has been shown previously to be strain specific (Kim et al., 2011) |                          |               |                |                           |                                 |  |

**Figure S1**

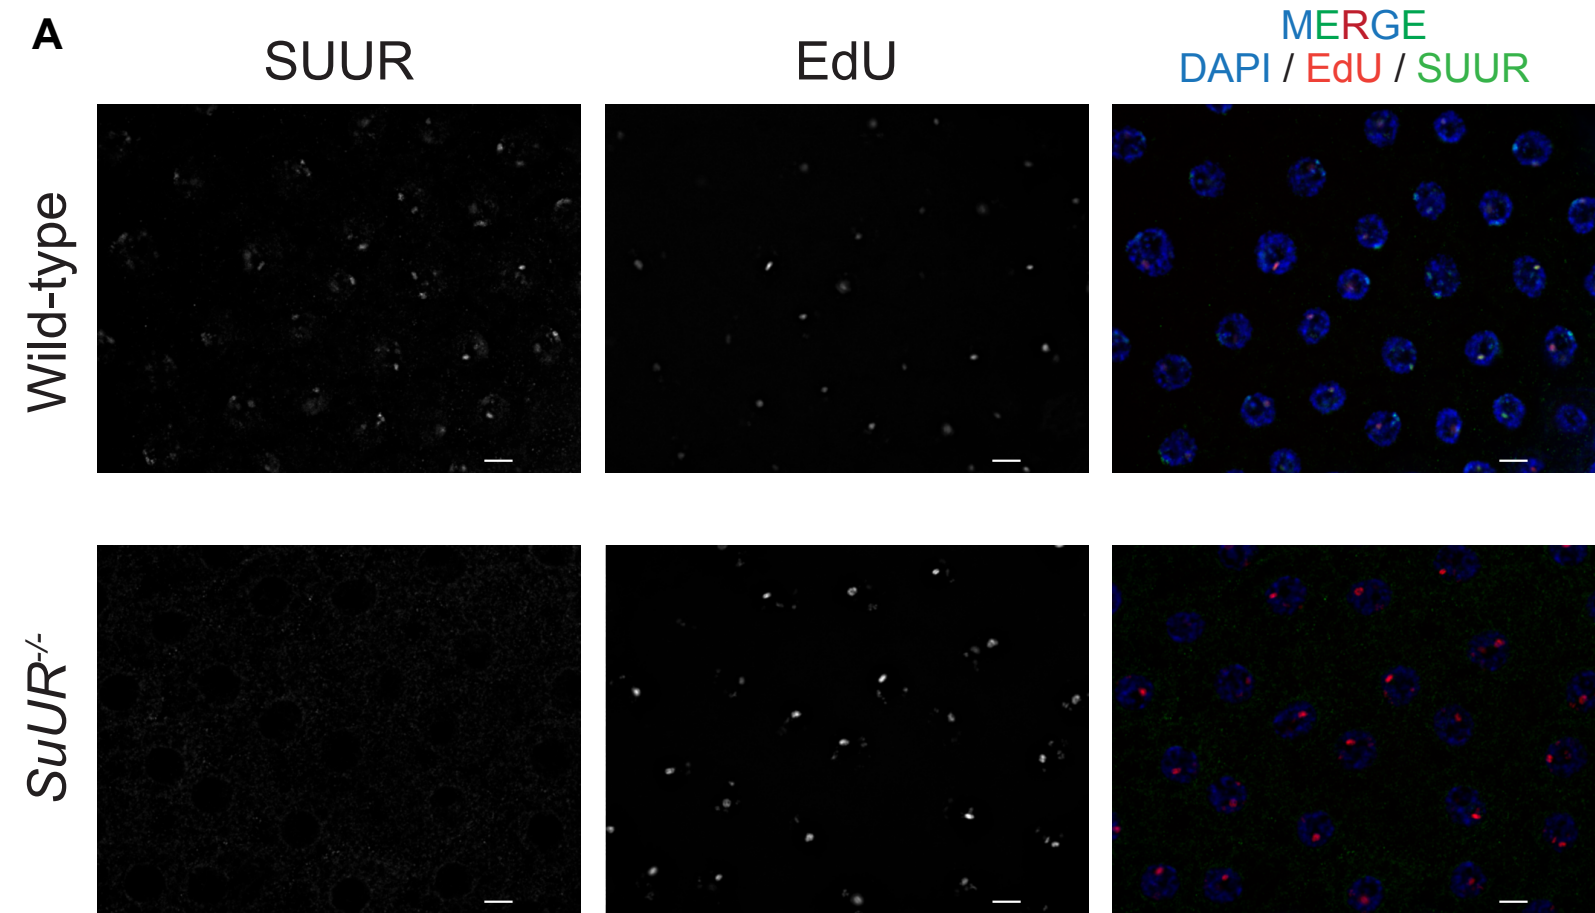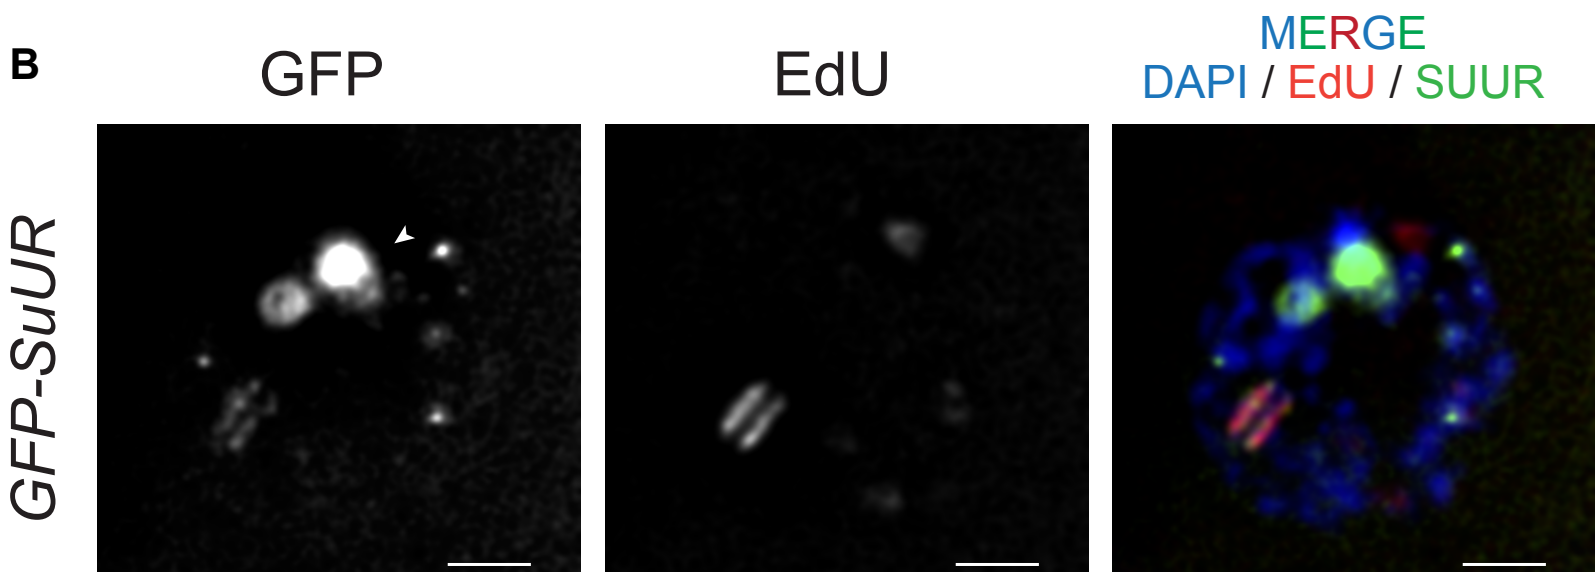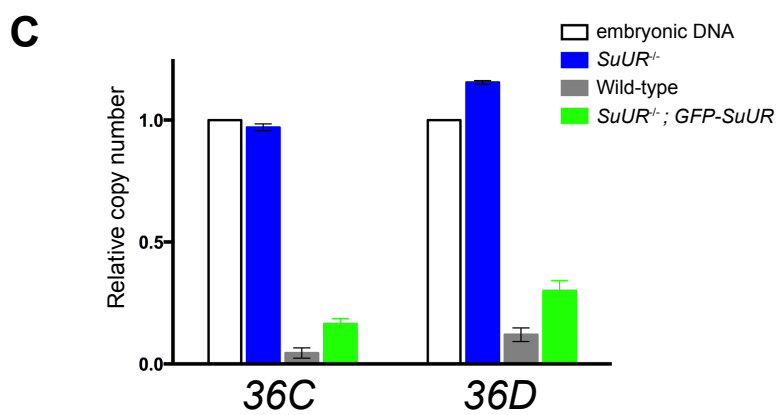

# Figure S2

Wild-type  $SuUR^{-/-}$  4X-*SuUR* 6X-*SuUR*

**DAFC-7F**

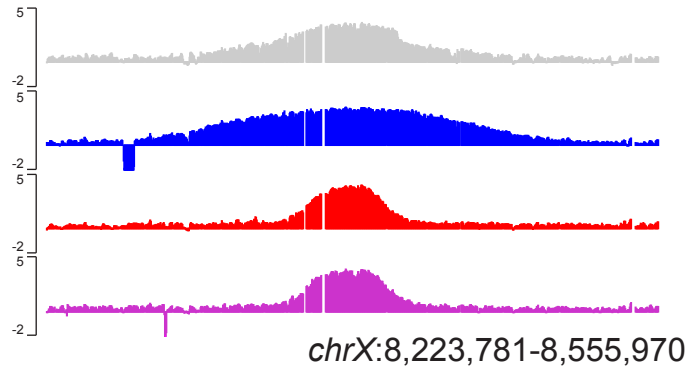

**DAFC-30B**

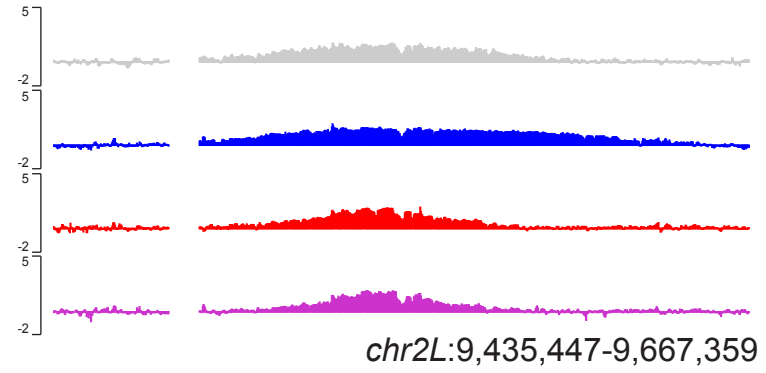

**DAFC-34B**

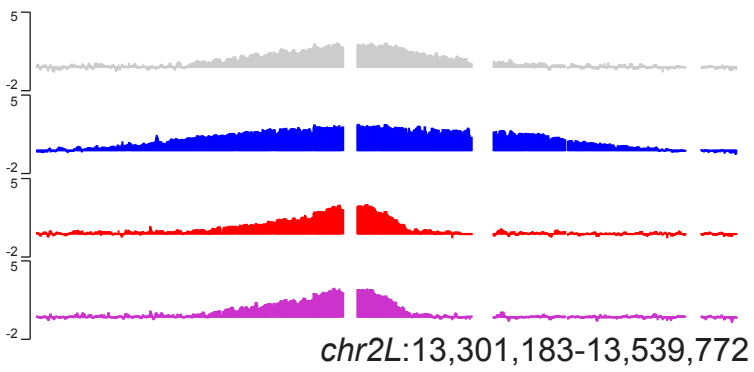

**DAFC-62D**

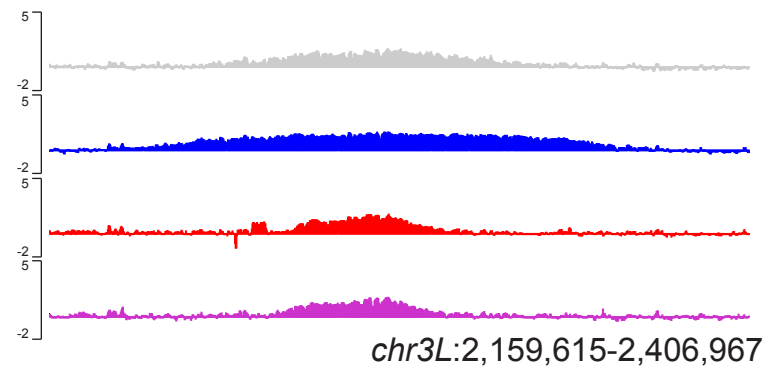

# Figure S3

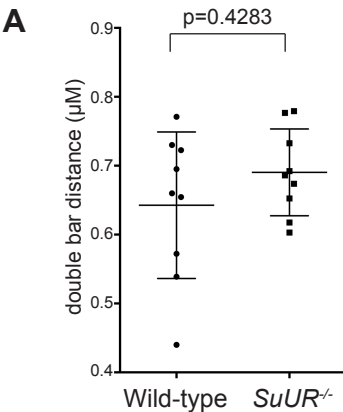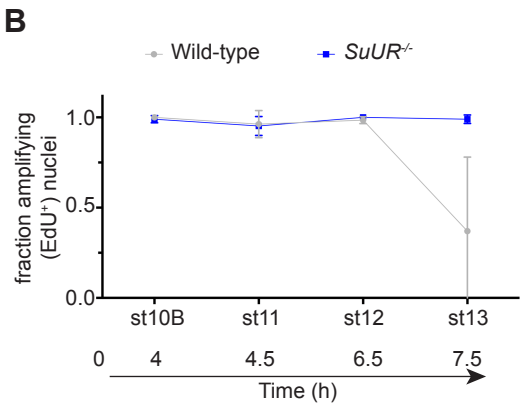

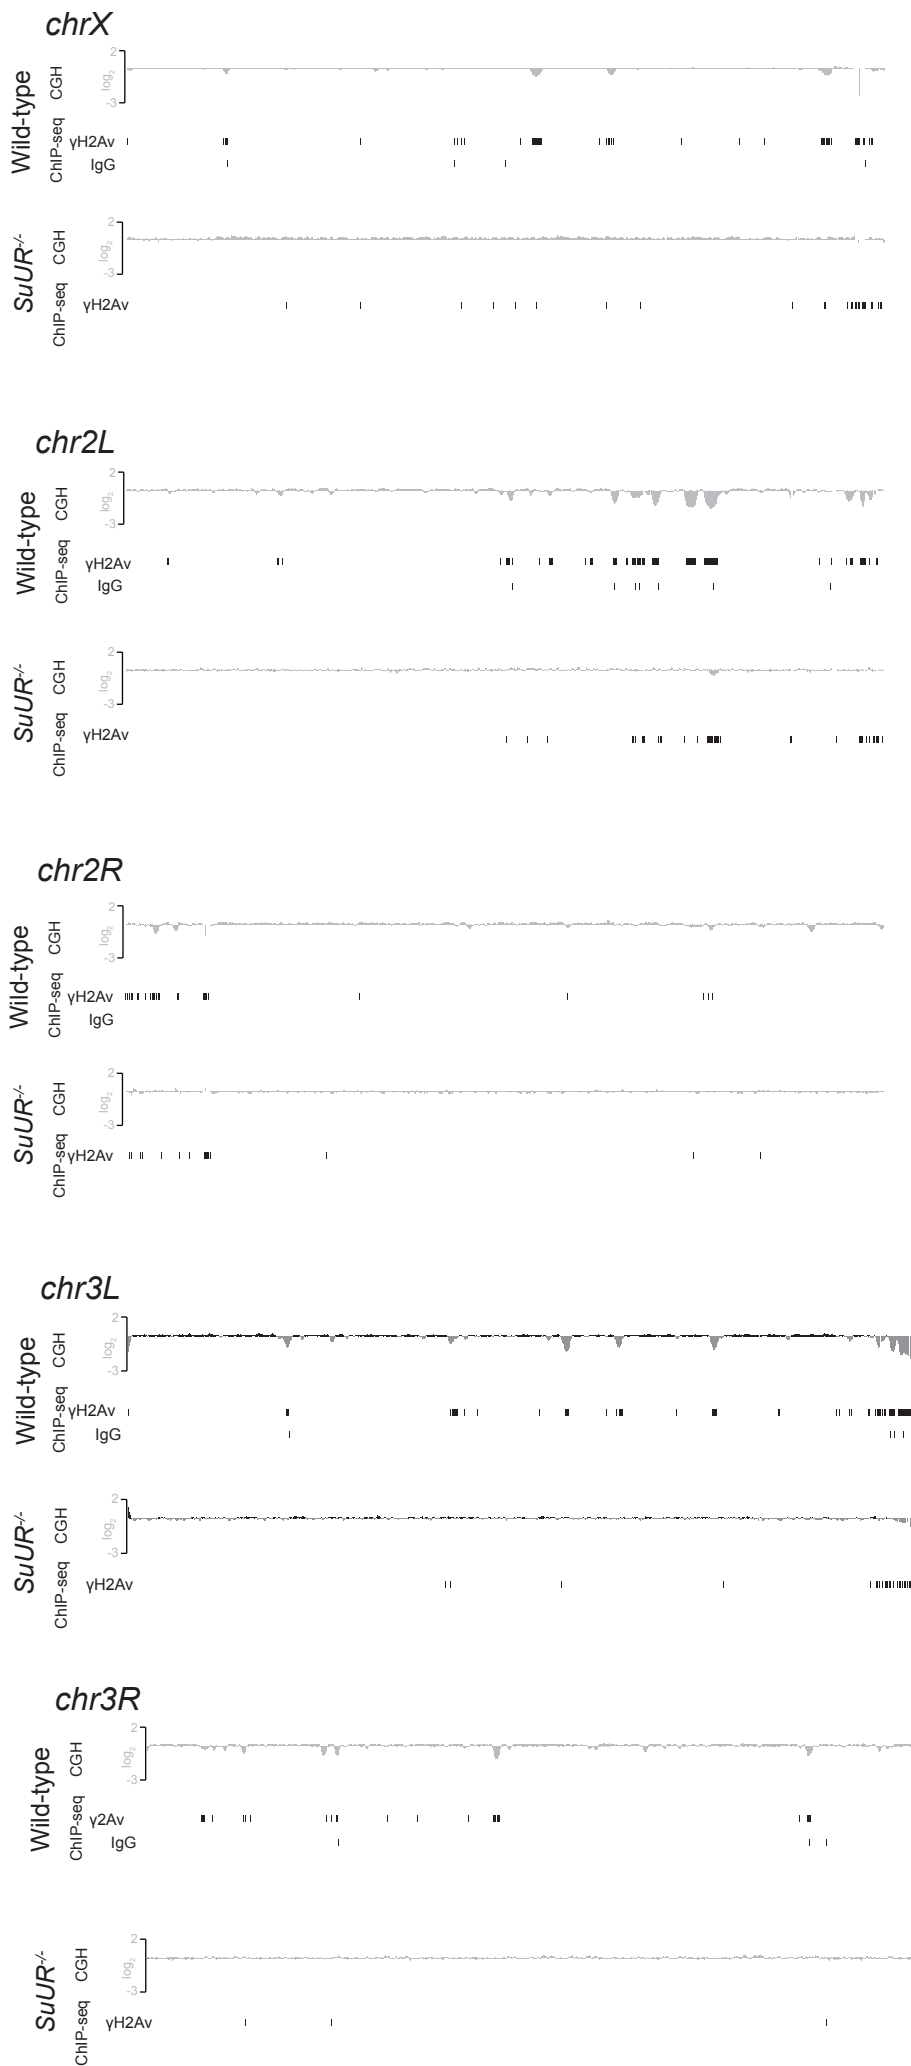

Supplement: NIHMS634156-supplement-2.pdf [file NIHMS634156-supplement-2.pdf]
